# Supplementary material
Source: Springer Nature journal article supplement (https://www.springermedizin.de/resource/supplementary/13054_2013_2412_MOESM2_ESM.pdf/9713902)
Supplement: MOESM2 [file 9713902]

## Initial Assessments

Assessment of suitability for physical and occupational therapy by medical team  
Functional evaluation by PT/OT to assess level of activity

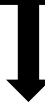

## Preparation for Physical Therapy

Secure all intravenous lines, remove extraneous connections  
Ensure adequate portable oxygen supply (respiratory therapist as needed)  
Ensure hemodynamic monitoring available throughout treatment  
Inspect extracorporeal circuit

- Ensure adequate tubing slack to allow safe movement of patient without undue strain on circuit
- Tighten all connections
- Assess for leaks and thromboses within tubing

Assemble and brief the team (PT, OT, nurse, perfusionist, nurse practitioner)

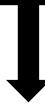

## Initiation of Physical Therapy

### Responsibilities:

- Monitoring vital signs: PT, OT, and nurse
- Monitoring circuit integrity: perfusionist
- Assisting the patient and providing contact guard: PT, OT
